# Supplementary material for: Biomass-derived three-dimensional carbon framework for a flexible fibrous supercapacitor and its application as a wearable smart textile
Source: PubMed Central journal article supplement — RSC Adv. 2020 Feb 17;10(12):6960–72. doi: 10.1039/c9ra07441d (PMC9049747; doi:10.1039/c9ra07441d), 2020-02-17
Supplement: RA-010-C9RA07441D-s001.pdf [file RA-010-C9RA07441D-s001.pdf]

## Supporting Information

### **Biomass derived three-dimensional carbon framework for flexible fibrous supercapacitors and their application as wearable smart textile**

Chunghsuan Hsiao, Chiyong Lee, and Nyanhwa Tai\*

Department of Materials Science and Engineering, National Tsing Hua University, No. 101, Sec. 2

Kuang-Fu Rd., Hsinchu, 300, Taiwan, Republic of China.

\*E-mail: nhtai@mx.nthu.edu.tw

Calculation of the electrochemical capacitance for electrode and FSSC: The capacitances (C) of a AC-TC800-CFB electrode and FSSC were determined using both CV and GCD according to eqns (1) and (2), respectively:

$$C = \frac{Q}{2V} = \frac{1}{2V\nu} \int_{V_-}^{V_+} i(V)dV \quad (1)$$

where Q is the total voltammetric charge obtained by integrating the area within the CV curves, V is the scanned potential window ( $V = V_+ - V_-$ ),  $\nu$  is the scan rate of the CV curves, and  $i(V)$  is the current intensity.

$$C = i/(dV/dt) \quad (2)$$

where  $i$  is the discharge current in the GCD, t is the discharge time in the GCD, and V is the voltage.

The specific gravimetric capacitance  $C_{\text{mass (all electrode)}}$  of the AC-TC800-CFB electrode and FSSC was calculated using

$$C_{\text{mass (all electrode)}} = C/m_D \quad (3)$$

$$C_{\text{mass (only activated material)}} = C/m_A \quad (4)$$

where  $m_D$  denotes the mass of the device (activated materials and current collector), and  $m_A$  indicates the mass of the activated materials (AC, TC, and CB) in a single electrode.

The specific length capacitance ( $C_{\text{length}}$ ) of an AC-TC800-CFB electrode or FSSC was calculated using

$$C_{\text{length}} = C/L \quad (5)$$

where  $L$  denotes the length of an AC-TC800-CFB electrode or FSSC.

The specific areal capacitance  $C_{\text{area}}$  of the AC-TC800-CFB electrode or FSSC was calculated using

$$C_{area} = C/A \quad (6)$$

where  $A$  denotes the surface area of the overlapping portion, equal to the circumference of the cross-section multiplied by the length of the overlapped portion of the AC-TC800-CFB electrode or FSSC fiber.

The circumference was obtained by multiplying  $\pi$  by the diameter of the fibers obtained in the SEM images.

The specific volume capacitance ( $C_{volume}$ ) of the AC-TC800-CFB electrode or FSSC was calculated using

$$C_{volume} = C/V \quad (7)$$

where  $V$  denotes the volume in the overlapping portion, which is equal to the cross-sectional area multiplied by the length of the overlapped portion of the AC-TC800-CFB electrode or FSSC fiber.

The specific energy density ( $E_t$ ) and specific power density ( $P_t$ ) of the FSSCs can be obtained from

$$E_i = \frac{1}{2} C_i U^2 \quad (8)$$

$$P_i = \frac{3600 E_i}{t_{discharge}} \quad (9)$$

where  $U$  is the total voltammetric charge obtained by integrating the area within the CV curves, and  $t_{discharge}$  is the discharge time.  $C_i$  can be the mass (giving the gravimetric capacitance,  $F g^{-1}$ ), length ( $cm^{-1}$ ), area ( $cm^{-2}$ ), or volume ( $cm^{-3}$ ) of one electrode ( $C_i$ ) or two electrodes ( $2C_i$ ), which respectively result in gravimetric ( $W h kg^{-1}$ ,  $W kg^{-1}$ ), length ( $W h cm^{-1}$ ,  $W cm^{-1}$ ), areal ( $W h cm^{-2}$ ,  $W cm^{-2}$ ), or volumetric ( $W h cm^{-3}$ ,  $W cm^{-3}$ ) energy density ( $E_i$ ) (eqn (8)) and power density ( $P_i$ ) (eqn (9)).

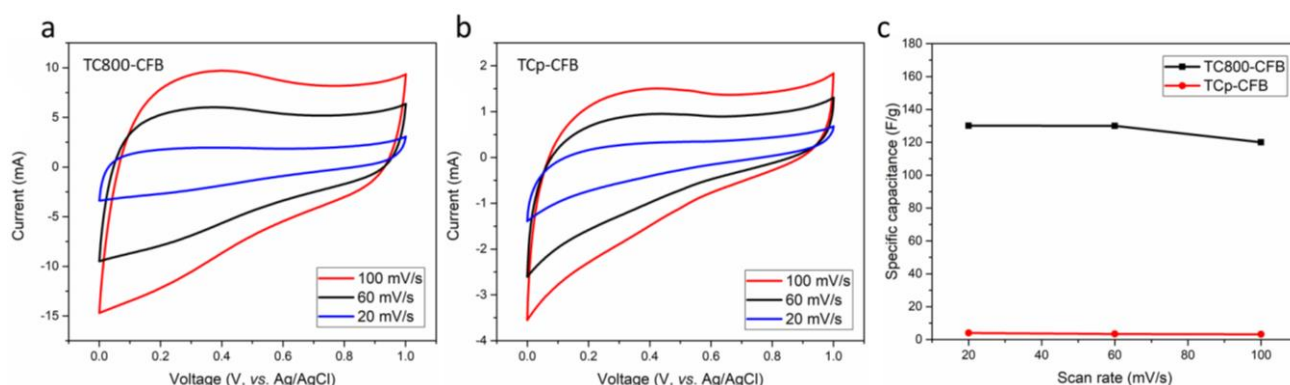

**Fig. S1.** The electrochemical characterization results for the electrodes based on three-electrode systems, and the electrolyte was an aqueous solution of 1 M  $H_2SO_4$ . The CV curves and specific capacitances of TC800-CFB and TCp-CFB electrodes at different scan rates are shown (a–c).

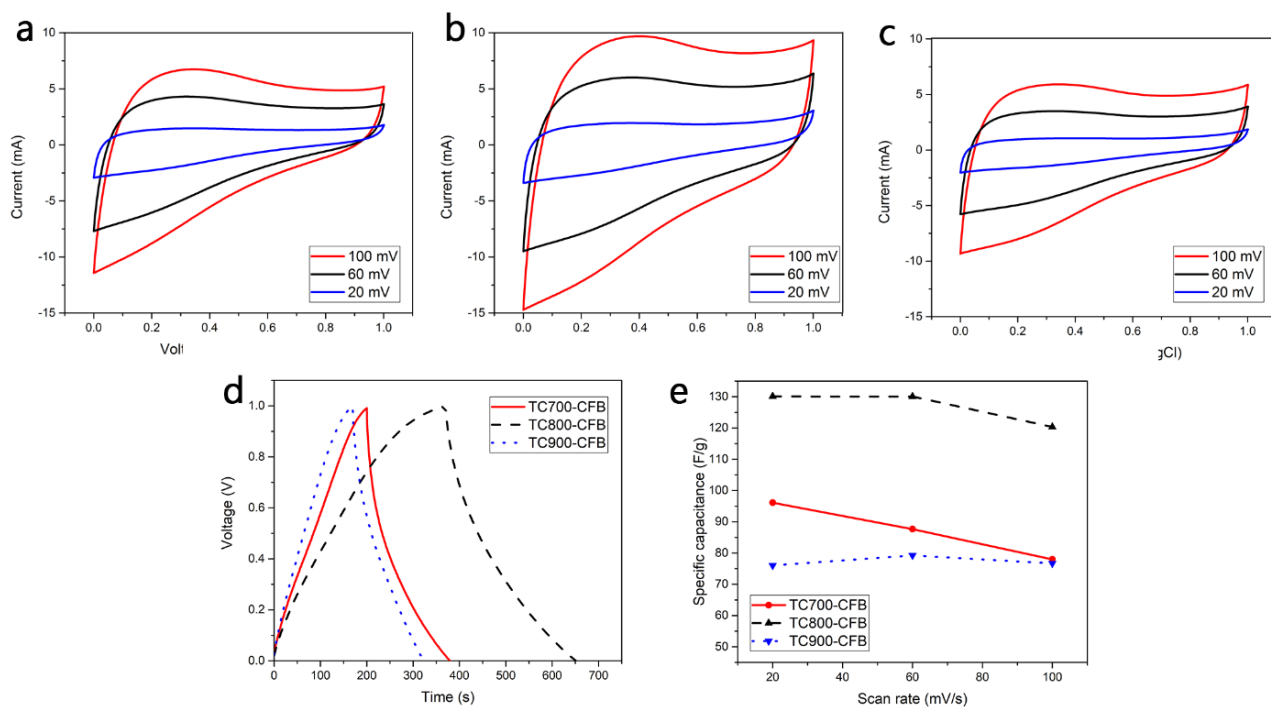

**Fig. S2.** The CV curves of TC-CFB electrodes treated at (a) 700, (b) 800 and (c) 900 °C and tested at different scan rates. (d) GCD test results of TC700-CFB, TC800-CFB, and TC900-CFB. Specific capacitance of TC700-CFB, TC800-CFB, and TC900-CFB measured under different scan rates.

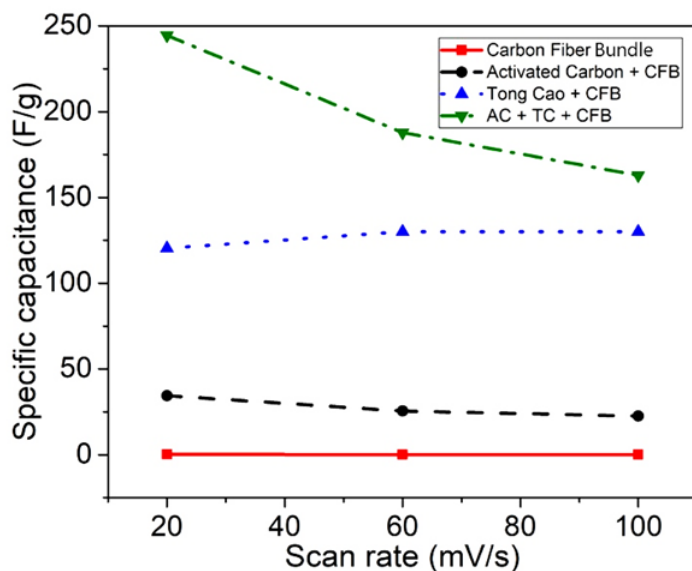

**Fig. S3.** Gravimetric capacitances,  $C_{\text{mass}}$ , for bare CFB, AC-CFB, TC-CFB, and AC-TC-CFB with a length of 1.5 cm tested at different scan rates using 1M  $\text{H}_2\text{SO}_4$  as the electrolyte.

**Table S1.** Electrochemical performances of the AC-TC-CFB fiber supercapacitor.

| Energy or power<br>Current densities<br>density (A g <sup>-1</sup> ) | E <sub>mass*</sub><br>(mWh<br>kg <sup>-1</sup> ) | E <sub>mass**</sub><br>(mWh<br>kg <sup>-1</sup> ) | E <sub>length</sub><br>(μWh<br>cm <sup>-1</sup> ) | E <sub>area</sub><br>(μWh<br>cm <sup>-2</sup> ) | E <sub>volume</sub><br>(mWh<br>cm <sup>-3</sup> ) | P <sub>mass*</sub><br>(mW<br>kg <sup>-1</sup> ) | P <sub>mass**</sub><br>(mW<br>kg <sup>-1</sup> ) | P <sub>length</sub><br>(mW<br>cm <sup>-1</sup> ) | P <sub>area</sub><br>(mW<br>cm <sup>-2</sup> ) | P <sub>volume</sub><br>(mW<br>cm <sup>-3</sup> ) |
|----------------------------------------------------------------------|--------------------------------------------------|---------------------------------------------------|---------------------------------------------------|-------------------------------------------------|---------------------------------------------------|-------------------------------------------------|--------------------------------------------------|--------------------------------------------------|------------------------------------------------|--------------------------------------------------|
| 0.1                                                                  | 3.85                                             | 19.9                                              | 3.98                                              | 16.1                                            | 3.26                                              | 66.1                                            | 342                                              | 0.07                                             | 1.99                                           | 56.0                                             |
| 0.2                                                                  | 3.08                                             | 15.9                                              | 3.18                                              | 12.9                                            | 2.61                                              | 132                                             | 683                                              | 0.14                                             | 3.98                                           | 112                                              |
| 0.6                                                                  | 1.96                                             | 10.1                                              | 2.03                                              | 8.19                                            | 1.66                                              | 397                                             | 2050                                             | 0.41                                             | 11.9                                           | 336                                              |
| 1.0                                                                  | 1.43                                             | 7.40                                              | 1.48                                              | 5.98                                            | 1.21                                              | 661                                             | 3420                                             | 0.68                                             | 19.9                                           | 560                                              |
| 2.0                                                                  | 0.66                                             | 3.42                                              | 0.68                                              | 2.76                                            | 0.56                                              | 1320                                            | 6830                                             | 1.37                                             | 39.8                                           | 1120                                             |

E<sub>mass\*</sub>: mass energy density calculated based on electrode weight; E<sub>mass\*\*</sub>: mass energy density calculated based on the weight of activated material;

E<sub>length</sub>: length energy density; E<sub>area</sub>: area energy density; E<sub>volume</sub>: volume energy density; P<sub>mass\*</sub>: mass energy density calculated based on electrode

weight; P<sub>mass\*\*</sub>: mass energy density calculated based on the weight of activated material; P<sub>length</sub>: length power density; P<sub>area</sub>: area power density; and

P<sub>volume</sub>: volume energy density.
